# Supplementary material
Source: PubMed Central journal article supplement (PMC4104167)
Supplement: NIHMS601716-supplement-Supplement.pdf [file NIHMS601716-supplement-Supplement.pdf]

**Supplemental Materials for “How Universal Is the Big Five? Testing the Five-Factor Model of Personality Variation Among Forager–Farmers in the Bolivian Amazon”**

**Table S1**

*Rotated Component Matrix (Unrestricted EFA)*

| Item                                      | Item # | Factor        |              |        |        |        |        |        |        |        |        |        |
|-------------------------------------------|--------|---------------|--------------|--------|--------|--------|--------|--------|--------|--------|--------|--------|
|                                           |        | 1             | 2            | 3      | 4      | 5      | 6      | 7      | 8      | 9      | 10     | 11     |
| <i>Variance explained (post-rotation)</i> |        | 13.16%        | 9.85%        | 4.10%  | 3.94%  | 3.93%  | 3.79%  | 3.62%  | 3.58%  | 3.07%  | 2.80%  | 2.73%  |
| <i>Internal reliability (C. alpha)</i>    |        | 0.88          | 0.83         | 0.48   | 0.41   | -      | 0.41   | 0.49   | 0.53   | 0.30   | -      | -      |
| Is talkative                              | 1-E    | <b>0.642</b>  | 0.081        | -0.098 | 0.007  | -0.192 | -0.237 | 0.029  | 0.156  | 0.062  | 0.103  | 0.068  |
| Reserved                                  | 6-E    | <b>0.642</b>  | 0.221        | 0.000  | 0.116  | 0.264  | 0.055  | -0.005 | -0.118 | 0.134  | 0.074  | -0.036 |
| Shy                                       | 27-E   | <b>-0.590</b> | -0.075       | 0.140  | 0.103  | 0.288  | 0.224  | -0.007 | -0.203 | 0.052  | -0.139 | -0.020 |
| Generates enthusiasm                      | 32-E   | <b>0.613</b>  | 0.183        | -0.130 | 0.030  | -0.096 | -0.067 | 0.128  | 0.129  | 0.000  | -0.116 | -0.128 |
| Assertive                                 | 40-E   | <b>0.558</b>  | 0.107        | -0.185 | 0.105  | -0.301 | -0.088 | 0.099  | 0.187  | 0.048  | 0.082  | 0.052  |
| Outgoing                                  | 43-E   | <b>0.661</b>  | 0.131        | -0.007 | -0.061 | -0.013 | -0.114 | 0.078  | 0.222  | -0.100 | -0.103 | 0.128  |
| Trusting                                  | 24-A   | <b>0.639</b>  | 0.152        | -0.005 | -0.041 | -0.146 | 0.157  | 0.075  | 0.024  | 0.024  | 0.068  | -0.054 |
| Forgiving                                 | 28-A   | <b>0.628</b>  | 0.191        | 0.008  | -0.068 | 0.067  | 0.010  | -0.026 | -0.003 | -0.045 | 0.205  | -0.051 |
| Considerate                               | 37-A   | <b>0.349</b>  | 0.293        | 0.191  | -0.174 | -0.148 | -0.054 | -0.019 | 0.147  | 0.170  | 0.247  | -0.231 |
| Disorganized                              | 18-C   | <b>-0.352</b> | -0.160       | 0.167  | 0.087  | 0.338  | 0.168  | 0.101  | 0.069  | -0.069 | 0.161  | -0.075 |
| Makes plans                               | 34-C   | <b>0.505</b>  | 0.296        | 0.066  | -0.117 | -0.079 | 0.010  | 0.153  | -0.154 | 0.125  | 0.177  | -0.053 |
| Depressed, blue                           | 4-N    | <b>-0.406</b> | -0.331       | -0.027 | -0.074 | 0.164  | 0.307  | 0.065  | 0.244  | -0.050 | -0.095 | -0.120 |
| Original                                  | 5-O    | <b>0.752</b>  | 0.167        | -0.097 | -0.027 | 0.087  | -0.079 | 0.040  | -0.020 | 0.058  | -0.056 | 0.026  |
| Ingenious                                 | 31-O   | <b>0.584</b>  | 0.283        | -0.142 | -0.029 | -0.096 | -0.023 | 0.145  | 0.056  | -0.013 | 0.001  | -0.156 |
| Energetic                                 | 11-E   | 0.164         | <b>0.724</b> | -0.133 | 0.037  | -0.005 | -0.063 | 0.082  | -0.088 | 0.058  | -0.008 | 0.123  |
| Helpful, unselfish                        | 7-A    | 0.280         | <b>0.586</b> | 0.177  | -0.118 | -0.032 | 0.016  | 0.042  | 0.197  | -0.041 | -0.005 | -0.168 |

|                          |      |        |               |               |              |              |              |              |               |              |              |              |
|--------------------------|------|--------|---------------|---------------|--------------|--------------|--------------|--------------|---------------|--------------|--------------|--------------|
| Cooperative              | 41-A | 0.377  | <b>0.525</b>  | 0.193         | -0.126       | 0.117        | -0.006       | 0.097        | 0.206         | 0.001        | -0.128       | -0.243       |
| Thorough                 | 3-C  | 0.234  | <b>0.675</b>  | -0.138        | 0.126        | 0.017        | -0.044       | 0.083        | -0.135        | -0.044       | 0.022        | 0.063        |
| Reliable worker          | 14-C | 0.360  | <b>0.620</b>  | -0.072        | -0.071       | 0.043        | 0.040        | 0.027        | 0.070         | -0.003       | 0.028        | -0.003       |
| Perseveres               | 21-C | 0.139  | <b>0.648</b>  | -0.186        | -0.012       | -0.156       | -0.054       | 0.158        | 0.086         | 0.107        | -0.024       | 0.123        |
| Lazy                     | 25-C | -0.279 | <b>-0.453</b> | 0.163         | 0.067        | 0.400        | 0.147        | 0.151        | -0.018        | -0.018       | -0.084       | -0.053       |
| Inventive                | 23-O | 0.142  | <b>0.614</b>  | -0.082        | 0.122        | -0.129       | -0.120       | 0.051        | 0.139         | 0.059        | 0.045        | -0.009       |
| Careless                 | 8-C  | -0.047 | -0.009        | <b>0.635</b>  | -0.046       | 0.192        | 0.036        | 0.076        | 0.055         | -0.010       | 0.055        | 0.019        |
| Relaxed                  | 9-N  | 0.068  | 0.039         | <b>-0.312</b> | 0.242        | 0.077        | 0.282        | -0.038       | 0.311         | -0.130       | 0.086        | 0.180        |
| Tense                    | 15-N | -0.168 | -0.367        | <b>0.507</b>  | 0.067        | 0.060        | 0.079        | -0.191       | -0.081        | 0.065        | -0.021       | -0.033       |
| Nervous easily           | 38-N | -0.215 | -0.230        | <b>0.625</b>  | 0.019        | -0.015       | 0.016        | -0.142       | -0.181        | 0.027        | -0.056       | 0.155        |
| Finds fault              | 2-A  | -0.134 | 0.052         | -0.134        | <b>0.671</b> | -0.029       | -0.155       | -0.009       | 0.006         | -0.026       | 0.051        | -0.058       |
| Quarrelsome              | 13-A | -0.023 | 0.119         | 0.054         | <b>0.499</b> | 0.211        | -0.224       | 0.253        | -0.087        | -0.188       | -0.205       | -0.177       |
| Easily distracted        | 42-C | 0.003  | -0.119        | 0.123         | <b>0.523</b> | 0.026        | 0.098        | -0.187       | -0.037        | 0.322        | 0.108        | 0.273        |
| Moody                    | 30-N | -0.013 | -0.062        | 0.277         | <b>0.405</b> | -0.382       | 0.239        | 0.021        | 0.058         | -0.017       | -0.373       | 0.192        |
| Curious                  | 10-O | 0.034  | -0.185        | 0.185         | <b>0.391</b> | -0.119       | 0.296        | 0.329        | 0.179         | 0.156        | 0.231        | -0.234       |
| Cold or aloof            | 33-A | -0.167 | -0.127        | 0.147         | 0.023        | <b>0.721</b> | 0.064        | -0.127       | -0.033        | -0.007       | -0.102       | 0.099        |
| Quiet                    | 16-E | -0.197 | -0.084        | 0.091         | -0.022       | 0.084        | <b>0.647</b> | -0.143       | -0.008        | -0.027       | -0.105       | 0.053        |
| Calm in tense situations | 35-N | -0.033 | -0.060        | -0.007        | -0.105       | 0.014        | <b>0.698</b> | -0.054       | -0.085        | 0.043        | 0.085        | 0.026        |
| Rude                     | 22-A | 0.074  | 0.357         | -0.042        | 0.372        | 0.103        | 0.001        | <b>0.451</b> | -0.027        | -0.027       | 0.097        | 0.050        |
| Efficient                | 29-C | 0.165  | 0.316         | -0.070        | -0.041       | -0.004       | -0.094       | <b>0.427</b> | 0.062         | 0.142        | -0.060       | 0.042        |
| Likes to reflect         | 36-O | 0.163  | 0.106         | -0.046        | -0.012       | -0.122       | -0.162       | <b>0.710</b> | 0.016         | -0.019       | -0.067       | 0.186        |
| Sophisticated in arts    | 39-O | 0.137  | 0.061         | -0.129        | -0.014       | -0.171       | -0.080       | 0.118        | <b>0.741</b>  | 0.120        | 0.074        | 0.036        |
| Few artistic interests   | 44-O | -0.384 | -0.244        | -0.093        | 0.040        | -0.348       | 0.059        | 0.169        | <b>-0.574</b> | -0.009       | 0.070        | -0.055       |
| Worrisome                | 26-N | -0.014 | 0.206         | 0.153         | 0.031        | -0.075       | 0.096        | -0.154       | 0.135         | <b>0.615</b> | 0.000        | -0.105       |
| Likes art                | 17-O | 0.110  | -0.036        | -0.093        | -0.022       | 0.047        | -0.084       | 0.234        | -0.029        | <b>0.767</b> | -0.112       | 0.084        |
| Emotionally stable       | 19-N | 0.172  | 0.019         | 0.007         | 0.081        | -0.079       | 0.020        | -0.050       | 0.044         | -0.101       | <b>0.772</b> | 0.082        |
| Likes routine            | 12-O | -0.081 | 0.143         | 0.108         | -0.035       | 0.029        | 0.075        | 0.236        | 0.094         | 0.006        | 0.056        | <b>0.748</b> |

**Table S2***EFA (Restricted to Five Factors) After Removal of Reverse-Scored Items*

| Item                                      | Item # | Factor        |               |              |        |        |
|-------------------------------------------|--------|---------------|---------------|--------------|--------|--------|
|                                           |        | 1             | 2             | 3            | 4      | 5      |
| <i>Variance explained (post-rotation)</i> |        | 17.11%        | 13.54%        | 6.30%        | 5.79%  | 5.29%  |
| <i>Internal reliability (C. alpha)</i>    |        | 0.86          | 0.79          | 0.60         | 0.35   | 0.20   |
| Is talkative                              | 1-E    | <b>0.692</b>  | 0.141         | -0.008       | 0.147  | 0.116  |
| Generates enthusiasm                      | 32-E   | <b>0.609</b>  | 0.184         | 0.114        | 0.229  | 0.004  |
| Assertive                                 | 40-E   | <b>0.605</b>  | 0.157         | -0.039       | 0.314  | 0.174  |
| Outgoing                                  | 43-E   | <b>0.672</b>  | 0.133         | 0.035        | 0.167  | -0.002 |
| Trusting                                  | 24-A   | <b>0.642</b>  | 0.073         | 0.201        | 0.073  | 0.041  |
| Forgiving                                 | 28-A   | <b>0.634</b>  | 0.106         | 0.187        | -0.027 | -0.124 |
| Makes plans                               | 34-C   | <b>0.546</b>  | 0.254         | 0.204        | -0.124 | 0.001  |
| Depressed, blue                           | 4-N    | <b>-0.467</b> | -0.396        | 0.036        | 0.273  | -0.030 |
| Original                                  | 5-O    | <b>0.732</b>  | 0.206         | 0.051        | 0.010  | -0.041 |
| Ingenious                                 | 31-O   | <b>0.590</b>  | 0.285         | 0.116        | 0.190  | -0.020 |
| Energetic                                 | 11-E   | 0.154         | <b>0.747</b>  | 0.146        | -0.021 | -0.037 |
| Thorough                                  | 3-C    | 0.238         | <b>0.709</b>  | 0.047        | -0.036 | -0.087 |
| Reliable worker                           | 14-C   | 0.338         | <b>0.532</b>  | 0.323        | 0.093  | -0.163 |
| Perseveres                                | 21-C   | 0.139         | <b>0.700</b>  | 0.138        | 0.194  | 0.067  |
| Efficient                                 | 29-C   | 0.168         | <b>0.454</b>  | 0.004        | 0.109  | 0.201  |
| Tense                                     | 15-N   | -0.158        | <b>-0.491</b> | 0.111        | -0.488 | 0.163  |
| Inventive                                 | 23-O   | 0.159         | <b>0.586</b>  | 0.215        | 0.157  | 0.061  |
| Likes to reflect                          | 36-O   | 0.206         | <b>0.390</b>  | -0.288       | 0.158  | 0.335  |
| Helpful, unselfish                        | 7-A    | 0.273         | 0.398         | <b>0.520</b> | 0.044  | -0.106 |
| Considerate                               | 37-A   | 0.374         | 0.068         | <b>0.567</b> | 0.107  | -0.003 |
| Cooperative                               | 41-A   | 0.315         | 0.343         | <b>0.553</b> | 0.070  | -0.090 |
| Worrisome                                 | 26-N   | -0.070        | 0.049         | <b>0.570</b> | -0.055 | 0.375  |

|                       |      |        |        |        |               |              |
|-----------------------|------|--------|--------|--------|---------------|--------------|
| Nervous easily        | 38-N | -0.194 | -0.286 | 0.029  | <b>-0.632</b> | 0.219        |
| Sophisticated in arts | 39-O | 0.170  | 0.008  | 0.160  | <b>0.648</b>  | 0.242        |
| Moody                 | 30-N | -0.092 | 0.004  | -0.071 | -0.115        | <b>0.560</b> |
| Curious               | 10-O | 0.026  | -0.195 | 0.067  | 0.171         | <b>0.537</b> |
| Likes art             | 17-O | 0.088  | 0.144  | 0.062  | -0.017        | <b>0.523</b> |

---

**Table S3***EFA (Restricted to Five Factors) with Items of Intermediate Mean Response Scores Only*

| Item                                      | Item # | Factor        |              |              |        |        |
|-------------------------------------------|--------|---------------|--------------|--------------|--------|--------|
|                                           |        | 1             | 2            | 3            | 4      | 5      |
| <i>Variance explained (post-rotation)</i> |        | 16.90%        | 8.28%        | 7.59%        | 4.63%  | 4.60%  |
| <i>Internal reliability (C. alpha)</i>    |        | 0.89          | 0.54         | 0.61         | 0.34   | 0.25   |
| Is talkative                              | 1-E    | <b>0.600</b>  | -0.402       | 0.013        | 0.126  | 0.073  |
| Reserved                                  | 6-E    | <b>0.661</b>  | 0.060        | 0.129        | -0.038 | 0.041  |
| Shy                                       | 27-E   | <b>-0.546</b> | 0.456        | 0.034        | -0.205 | 0.042  |
| Generates enthusiasm                      | 32-E   | <b>0.570</b>  | -0.242       | 0.176        | 0.135  | -0.038 |
| Assertive                                 | 40-E   | <b>0.491</b>  | -0.433       | 0.093        | 0.246  | 0.126  |
| Outgoing                                  | 43-E   | <b>0.628</b>  | -0.147       | 0.102        | 0.183  | 0.009  |
| Helpful, unselfish                        | 7-A    | <b>0.467</b>  | 0.052        | 0.408        | -0.027 | -0.269 |
| Trusting                                  | 24-A   | <b>0.618</b>  | -0.169       | 0.059        | 0.092  | 0.060  |
| Forgiving                                 | 28-A   | <b>0.673</b>  | -0.081       | -0.022       | 0.049  | -0.073 |
| Cooperative                               | 41-A   | <b>0.536</b>  | 0.142        | 0.417        | -0.035 | -0.269 |
| Reliable worker                           | 14-C   | <b>0.481</b>  | -0.031       | 0.473        | 0.070  | -0.225 |
| Makes plans                               | 34-C   | <b>0.554</b>  | -0.168       | 0.208        | -0.176 | -0.011 |
| Depressed, blue                           | 4-N    | <b>-0.428</b> | 0.355        | -0.175       | 0.260  | -0.035 |
| Original                                  | 5-O    | <b>0.716</b>  | -0.161       | 0.101        | 0.017  | -0.014 |
| Ingenious                                 | 31-O   | <b>0.575</b>  | -0.256       | 0.195        | 0.097  | -0.126 |
| Few artistic interests                    | 44-O   | <b>-0.532</b> | -0.316       | -0.133       | -0.351 | 0.175  |
| Quiet                                     | 16-E   | -0.185        | <b>0.438</b> | -0.141       | 0.140  | 0.054  |
| Cold or aloof                             | 33-A   | -0.118        | <b>0.648</b> | -0.060       | -0.057 | -0.059 |
| Careless                                  | 8-C    | 0.123         | <b>0.487</b> | -0.022       | -0.240 | 0.155  |
| Disorganized                              | 18-C   | -0.287        | <b>0.451</b> | -0.070       | 0.059  | 0.042  |
| Lazy                                      | 25-C   | -0.331        | <b>0.457</b> | -0.195       | -0.033 | 0.147  |
| Rude                                      | 22-A   | 0.096         | -0.013       | <b>0.550</b> | 0.087  | 0.201  |

|                       |      |        |        |               |               |              |
|-----------------------|------|--------|--------|---------------|---------------|--------------|
| Perseveres            | 21-C | 0.226  | -0.243 | <b>0.626</b>  | 0.075         | -0.124       |
| Efficient             | 29-C | 0.178  | -0.138 | <b>0.539</b>  | -0.008        | 0.013        |
| Tense                 | 15-N | -0.114 | 0.377  | <b>-0.393</b> | -0.270        | 0.284        |
| Likes routine         | 12-O | -0.092 | 0.113  | <b>0.387</b>  | 0.165         | 0.330        |
| Likes to reflect      | 36-O | 0.056  | -0.288 | <b>0.522</b>  | 0.010         | 0.216        |
| Relaxed               | 9-N  | 0.013  | 0.053  | 0.062         | <b>0.604</b>  | 0.076        |
| Emotionally stable    | 19-N | 0.230  | -0.130 | -0.188        | <b>0.268</b>  | 0.127        |
| Nervous easily        | 38-N | -0.143 | 0.340  | -0.256        | <b>-0.398</b> | 0.336        |
| Sophisticated in arts | 39-O | 0.191  | -0.145 | 0.130         | <b>0.568</b>  | 0.028        |
| Easily distracted     | 42-C | -0.006 | 0.148  | -0.042        | 0.071         | <b>0.613</b> |
| Moody                 | 30-N | -0.093 | 0.023  | 0.059         | 0.069         | <b>0.550</b> |
| Likes art             | 17-O | 0.106  | -0.110 | 0.218         | -0.163        | <b>0.352</b> |

---

**Table S4***EFA (Restricted to Five Factors) After Correction for Acquiescence Bias*

| Item                                      | Item # | Factor        |               |        |        |        | Mean | Standard Deviation |
|-------------------------------------------|--------|---------------|---------------|--------|--------|--------|------|--------------------|
|                                           |        | 1             | 2             | 3      | 4      | 5      |      |                    |
| <i>Variance explained (post-rotation)</i> |        | 12.83%        | 10.31%        | 5.76%  | 3.93%  | 3.62%  |      |                    |
| <i>Internal reliability (C. alpha)</i>    |        | 0.86          | 0.79          | 0.57   | 0.29   | 0.08   |      |                    |
| Is talkative                              | 1-E    | <b>0.656</b>  | 0.074         | -0.006 | 0.168  | -0.062 | 3.47 | 1.06               |
| Reserved                                  | 6-E    | <b>0.475</b>  | 0.012         | -0.166 | -0.317 | 0.078  | 3.24 | 1.04               |
| Quiet                                     | 16-E   | <b>-0.477</b> | -0.298        | -0.132 | 0.054  | -0.209 | 3.36 | 1.29               |
| Shy                                       | 27-E   | <b>-0.690</b> | -0.257        | 0.200  | -0.058 | 0.125  | 2.39 | 1.18               |
| Generates enthusiasm                      | 32-E   | <b>0.584</b>  | 0.152         | -0.036 | 0.015  | 0.025  | 2.62 | 1.10               |
| Assertive                                 | 40-E   | <b>0.583</b>  | 0.150         | 0.100  | 0.266  | -0.165 | 3.19 | 1.15               |
| Outgoing                                  | 43-E   | <b>0.595</b>  | 0.059         | -0.098 | -0.026 | 0.008  | 2.62 | 1.03               |
| Trusting                                  | 24-A   | <b>0.516</b>  | 0.015         | -0.175 | 0.133  | -0.059 | 3.20 | 0.94               |
| Forgiving                                 | 28-A   | <b>0.512</b>  | 0.034         | -0.270 | -0.176 | -0.096 | 2.95 | 1.17               |
| Cold or aloof                             | 33-A   | <b>-0.427</b> | -0.370        | -0.001 | -0.360 | 0.132  | 2.23 | 1.11               |
| Disorganized                              | 18-C   | <b>-0.458</b> | -0.337        | 0.151  | -0.040 | -0.008 | 2.27 | 1.00               |
| Makes plans                               | 34-C   | <b>0.390</b>  | 0.144         | -0.148 | 0.089  | 0.176  | 3.76 | 0.91               |
| Depressed, blue                           | 4-N    | <b>-0.446</b> | -0.370        | 0.115  | 0.153  | -0.080 | 2.58 | 1.29               |
| Calm in tense situations                  | 35-N   | <b>-0.340</b> | -0.264        | -0.153 | 0.133  | -0.283 | 4.32 | 0.93               |
| Original                                  | 5-O    | <b>0.665</b>  | 0.073         | -0.132 | -0.152 | 0.086  | 2.78 | 1.05               |
| Likes routine                             | 12-O   | <b>-0.259</b> | 0.072         | 0.190  | 0.167  | -0.061 | 2.15 | 0.89               |
| Ingenious                                 | 31-O   | <b>0.545</b>  | 0.242         | -0.075 | 0.025  | 0.023  | 2.72 | 1.12               |
| Energetic                                 | 11-E   | 0.009         | <b>0.671</b>  | -0.007 | -0.034 | 0.114  | 3.91 | 0.88               |
| Thorough                                  | 3-C    | 0.088         | <b>0.624</b>  | 0.047  | -0.178 | 0.052  | 3.84 | 0.90               |
| Careless                                  | 8-C    | -0.259        | <b>-0.353</b> | -0.109 | -0.033 | 0.293  | 3.36 | 1.02               |
| Reliable worker                           | 14-C   | 0.181         | <b>0.541</b>  | -0.313 | -0.098 | -0.014 | 3.28 | 1.01               |
| Perseveres                                | 21-C   | 0.057         | <b>0.688</b>  | -0.032 | 0.151  | 0.005  | 3.29 | 1.14               |

|                        |      |        |               |               |              |               |      |      |
|------------------------|------|--------|---------------|---------------|--------------|---------------|------|------|
| Lazy                   | 25-C | -0.413 | <b>-0.538</b> | 0.244         | -0.057       | 0.084         | 1.89 | 0.91 |
| Efficient              | 29-C | 0.119  | <b>0.315</b>  | 0.148         | 0.113        | 0.232         | 2.71 | 1.03 |
| Easily distracted      | 42-C | -0.163 | <b>-0.278</b> | 0.259         | 0.125        | -0.139        | 3.29 | 1.08 |
| Tense                  | 15-N | -0.301 | <b>-0.586</b> | 0.026         | 0.084        | 0.157         | 2.83 | 1.39 |
| Nervous easily         | 38-N | -0.379 | <b>-0.490</b> | 0.025         | 0.037        | 0.210         | 3.54 | 1.30 |
| Inventive              | 23-O | 0.080  | <b>0.553</b>  | 0.022         | 0.160        | 0.043         | 3.87 | 0.96 |
| Finds fault            | 2-A  | -0.183 | -0.085        | <b>0.565</b>  | 0.096        | -0.052        | 1.71 | 0.61 |
| Helpful, unselfish     | 7-A  | 0.103  | 0.413         | <b>-0.417</b> | 0.023        | 0.165         | 3.61 | 1.04 |
| Quarrelsome            | 13-A | -0.103 | -0.017        | <b>0.533</b>  | -0.261       | 0.245         | 1.76 | 0.79 |
| Rude                   | 22-A | -0.009 | 0.333         | <b>0.442</b>  | -0.130       | 0.041         | 1.86 | 0.92 |
| Considerate            | 37-A | 0.251  | 0.039         | <b>-0.364</b> | 0.296        | 0.135         | 3.97 | 0.82 |
| Cooperative            | 41-A | 0.192  | 0.318         | <b>-0.429</b> | -0.087       | 0.330         | 3.66 | 0.99 |
| Moody                  | 30-N | -0.178 | -0.182        | <b>0.290</b>  | 0.251        | -0.038        | 3.37 | 1.04 |
| Likes to reflect       | 36-O | 0.182  | 0.205         | <b>0.449</b>  | 0.171        | 0.225         | 2.41 | 0.97 |
| Few artistic interests | 44-O | -0.217 | -0.043        | <b>0.369</b>  | 0.036        | -0.033        | 2.93 | 1.25 |
| Worrisome              | 26-N | -0.186 | -0.056        | -0.182        | <b>0.456</b> | 0.165         | 4.19 | 0.86 |
| Curious                | 10-O | -0.041 | -0.308        | 0.288         | <b>0.333</b> | -0.062        | 3.77 | 0.92 |
| Likes art              | 17-O | 0.054  | -0.049        | 0.146         | <b>0.424</b> | 0.349         | 3.09 | 1.19 |
| Sophisticated in arts  | 39-O | 0.187  | 0.090         | 0.023         | <b>0.538</b> | -0.138        | 2.96 | 1.15 |
| Relaxed                | 9-N  | -0.077 | 0.053         | 0.110         | -0.015       | <b>-0.586</b> | 2.54 | 1.31 |
| Emotionally stable     | 19-N | 0.133  | -0.084        | -0.031        | 0.015        | <b>-0.511</b> | 3.71 | 1.28 |

---



**Table S5***EFA (Restricted to Five Factors) of Female Sub-Sample (n=306)*

| Item                                      | Item # | Factor        |               |        |        |        | Mean | Standard Deviation |
|-------------------------------------------|--------|---------------|---------------|--------|--------|--------|------|--------------------|
|                                           |        | 1             | 2             | 3      | 4      | 5      |      |                    |
| <i>Variance explained (post-rotation)</i> |        | 11.25%        | 8.68%         | 4.86%  | 4.55%  | 4.44%  |      |                    |
| <i>Internal reliability (C. alpha)</i>    |        | 0.82          | 0.77          | 0.43   | 0.35   | 0.37   |      |                    |
| Is talkative                              | 1-E    | <b>0.629</b>  | 0.116         | -0.256 | -0.060 | 0.098  | 3.40 | 1.16               |
| Reserved                                  | 6-E    | <b>0.556</b>  | 0.202         | 0.137  | 0.117  | -0.008 | 3.28 | 1.13               |
| Quiet                                     | 16-E   | <b>-0.326</b> | -0.189        | 0.103  | -0.242 | 0.013  | 3.70 | 1.23               |
| Shy                                       | 27-E   | <b>-0.645</b> | -0.004        | 0.282  | 0.105  | 0.047  | 2.95 | 1.07               |
| Generates enthusiasm                      | 32-E   | <b>0.536</b>  | 0.125         | -0.126 | 0.129  | 0.003  | 2.52 | 1.05               |
| Assertive                                 | 40-E   | <b>0.540</b>  | -0.013        | -0.280 | -0.110 | 0.309  | 3.06 | 1.20               |
| Outgoing                                  | 43-E   | <b>0.641</b>  | -0.020        | -0.056 | 0.031  | 0.025  | 2.45 | 0.99               |
| Trusting                                  | 24-A   | <b>0.578</b>  | 0.180         | 0.130  | -0.181 | 0.009  | 3.26 | 1.02               |
| Forgiving                                 | 28-A   | <b>0.567</b>  | 0.143         | 0.158  | -0.060 | -0.196 | 2.97 | 1.23               |
| Considerate                               | 37-A   | <b>0.357</b>  | 0.307         | 0.075  | -0.295 | -0.067 | 4.03 | 0.94               |
| Makes plans                               | 34-C   | <b>0.417</b>  | 0.402         | 0.035  | -0.089 | 0.034  | 3.70 | 1.02               |
| Original                                  | 5-O    | <b>0.603</b>  | 0.130         | -0.018 | 0.170  | 0.029  | 2.65 | 1.03               |
| Ingenious                                 | 31-O   | <b>0.410</b>  | 0.274         | -0.037 | -0.014 | -0.051 | 2.51 | 0.96               |
| Sophisticated in arts                     | 39-O   | <b>0.317</b>  | -0.058        | -0.218 | -0.126 | -0.023 | 2.90 | 1.12               |
| Few artistic interests                    | 44-O   | <b>-0.395</b> | -0.147        | -0.172 | -0.003 | 0.291  | 2.95 | 1.30               |
| Energetic                                 | 11-E   | 0.046         | <b>0.686</b>  | -0.049 | 0.122  | -0.122 | 3.82 | 0.99               |
| Helpful, unselfish                        | 7-A    | 0.285         | <b>0.456</b>  | 0.249  | -0.079 | -0.166 | 3.45 | 1.21               |
| Cooperative                               | 41-A   | 0.356         | <b>0.378</b>  | 0.368  | 0.156  | -0.255 | 3.54 | 1.17               |
| Thorough                                  | 3-C    | 0.119         | <b>0.615</b>  | -0.043 | 0.083  | 0.032  | 3.68 | 1.03               |
| Reliable worker                           | 14-C   | 0.144         | <b>0.640</b>  | 0.039  | -0.087 | -0.108 | 3.05 | 1.09               |
| Perseveres                                | 21-C   | 0.131         | <b>0.650</b>  | -0.218 | 0.057  | 0.011  | 3.06 | 1.17               |
| Lazy                                      | 25-C   | -0.318        | <b>-0.437</b> | 0.343  | 0.297  | 0.034  | 2.30 | 0.91               |

|                          |      |        |               |               |               |              |      |      |
|--------------------------|------|--------|---------------|---------------|---------------|--------------|------|------|
| Efficient                | 29-C | 0.185  | <b>0.363</b>  | -0.169        | 0.207         | -0.056       | 2.73 | 1.02 |
| Depressed, blue          | 4-N  | -0.333 | <b>-0.426</b> | 0.089         | 0.084         | -0.072       | 2.98 | 1.18 |
| Likes routine            | 12-O | -0.053 | <b>0.262</b>  | -0.199        | 0.165         | 0.126        | 2.32 | 0.87 |
| Inventive                | 23-O | 0.035  | <b>0.525</b>  | -0.071        | 0.089         | -0.003       | 3.67 | 1.05 |
| Cold or aloof            | 33-A | -0.213 | -0.233        | <b>0.416</b>  | 0.314         | -0.246       | 2.65 | 1.13 |
| Careless                 | 8-C  | -0.012 | 0.056         | <b>0.587</b>  | -0.022        | 0.034        | 3.64 | 1.03 |
| Disorganized             | 18-C | -0.299 | -0.147        | <b>0.301</b>  | 0.031         | 0.120        | 2.67 | 1.01 |
| Relaxed                  | 9-N  | 0.032  | 0.076         | <b>-0.231</b> | 0.010         | 0.027        | 2.72 | 1.33 |
| Tense                    | 15-N | 0.019  | -0.210        | <b>0.482</b>  | -0.126        | 0.237        | 3.67 | 1.28 |
| Nervous easily           | 38-N | -0.229 | -0.005        | <b>0.412</b>  | -0.167        | 0.328        | 4.32 | 1.01 |
| Quarrelsome              | 13-A | -0.023 | 0.049         | 0.062         | <b>0.622</b>  | 0.057        | 1.99 | 0.80 |
| Rude                     | 22-A | -0.084 | 0.245         | 0.205         | <b>0.484</b>  | 0.221        | 1.72 | 0.67 |
| Emotionally stable       | 19-N | 0.181  | 0.092         | -0.080        | <b>-0.236</b> | 0.014        | 3.93 | 1.31 |
| Worrisome                | 26-N | 0.096  | 0.254         | 0.185         | <b>-0.311</b> | 0.212        | 4.41 | 0.91 |
| Calm in tense situations | 35-N | -0.048 | -0.056        | 0.205         | <b>-0.425</b> | 0.073        | 4.64 | 0.82 |
| Likes to reflect         | 36-O | 0.189  | 0.133         | -0.085        | <b>0.519</b>  | 0.168        | 2.38 | 0.87 |
| Finds fault              | 2-A  | -0.158 | 0.003         | -0.075        | 0.157         | <b>0.425</b> | 1.94 | 0.52 |
| Easily distracted        | 42-C | -0.089 | 0.026         | 0.058         | -0.029        | <b>0.627</b> | 3.62 | 1.08 |
| Moody                    | 30-N | 0.005  | -0.075        | -0.003        | 0.043         | <b>0.451</b> | 3.62 | 1.04 |
| Curious                  | 10-O | 0.160  | -0.143        | 0.184         | -0.057        | <b>0.556</b> | 4.00 | 0.94 |
| Likes art                | 17-O | 0.164  | 0.073         | 0.026         | 0.173         | <b>0.259</b> | 3.23 | 1.20 |

---

**Table S6***EFA (Restricted to Five Factors) of Male Sub-Sample (n=326)*

| Item                                      | Item # | Factor        |              |        |        |        | Mean | Standard Deviation |
|-------------------------------------------|--------|---------------|--------------|--------|--------|--------|------|--------------------|
|                                           |        | 1             | 2            | 3      | 4      | 5      |      |                    |
| <i>Variance explained (post-rotation)</i> |        | 14.50%        | 7.99%        | 7.81%  | 4.49%  | 3.90%  |      |                    |
| <i>Internal reliability (C. alpha)</i>    |        | 0.89          | 0.65         | 0.69   | 0.43   | 0.31   |      |                    |
| Is talkative                              | 1-E    | <b>0.595</b>  | -0.387       | -0.014 | 0.019  | 0.047  | 3.98 | 1.05               |
| Reserved                                  | 6-E    | <b>0.625</b>  | 0.108        | 0.254  | 0.099  | -0.055 | 3.66 | 1.18               |
| Shy                                       | 27-E   | <b>-0.528</b> | 0.495        | 0.097  | 0.055  | 0.007  | 2.31 | 0.99               |
| Generates enthusiasm                      | 32-E   | <b>0.607</b>  | -0.294       | 0.105  | 0.038  | 0.006  | 3.18 | 1.25               |
| Assertive                                 | 40-E   | <b>0.509</b>  | -0.449       | 0.159  | 0.103  | 0.035  | 3.78 | 1.12               |
| Outgoing                                  | 43-E   | <b>0.633</b>  | -0.120       | 0.080  | -0.026 | -0.062 | 3.22 | 1.13               |
| Helpful, unselfish                        | 7-A    | <b>0.459</b>  | 0.097        | 0.397  | -0.087 | -0.008 | 4.22 | 0.98               |
| Trusting                                  | 24-A   | <b>0.600</b>  | -0.297       | 0.082  | 0.092  | 0.019  | 3.59 | 1.00               |
| Forgiving                                 | 28-A   | <b>0.643</b>  | -0.125       | 0.147  | 0.043  | -0.040 | 3.39 | 1.29               |
| Considerate                               | 37-A   | <b>0.560</b>  | -0.015       | 0.006  | -0.030 | 0.093  | 4.37 | 0.81               |
| Cooperative                               | 41-A   | <b>0.609</b>  | 0.150        | 0.331  | -0.091 | 0.048  | 4.23 | 0.95               |
| Reliable worker                           | 14-C   | <b>0.530</b>  | -0.021       | 0.422  | -0.063 | -0.101 | 3.94 | 1.01               |
| Makes plans                               | 34-C   | <b>0.543</b>  | -0.036       | 0.046  | -0.039 | 0.095  | 4.27 | 0.86               |
| Original                                  | 5-O    | <b>0.736</b>  | -0.148       | 0.099  | -0.068 | -0.052 | 3.36 | 1.19               |
| Ingenious                                 | 31-O   | <b>0.609</b>  | -0.324       | 0.125  | -0.007 | 0.037  | 3.37 | 1.28               |
| Few artistic interests                    | 44-O   | <b>-0.578</b> | -0.249       | -0.059 | -0.177 | 0.134  | 2.46 | 1.33               |
| Quiet                                     | 16-E   | -0.077        | <b>0.559</b> | -0.157 | 0.024  | 0.182  | 3.49 | 1.28               |
| Cold or aloof                             | 33-A   | -0.079        | <b>0.653</b> | 0.068  | -0.066 | -0.137 | 2.29 | 1.00               |
| Careless                                  | 8-C    | 0.048         | <b>0.466</b> | -0.163 | 0.044  | 0.184  | 3.55 | 1.02               |
| Disorganized                              | 18-C   | -0.260        | <b>0.416</b> | -0.061 | 0.155  | -0.204 | 2.33 | 0.83               |
| Lazy                                      | 25-C   | -0.240        | <b>0.417</b> | -0.413 | 0.178  | -0.025 | 1.96 | 0.67               |
| Tense                                     | 15-N   | -0.143        | <b>0.450</b> | -0.305 | 0.027  | 0.176  | 2.49 | 1.04               |

|                          |      |        |               |               |              |              |      |      |
|--------------------------|------|--------|---------------|---------------|--------------|--------------|------|------|
| Calm in tense situations | 35-N | -0.041 | <b>0.297</b>  | -0.071        | 0.020        | 0.135        | 4.48 | 0.97 |
| Nervous easily           | 38-N | -0.095 | <b>0.400</b>  | -0.130        | -0.109       | 0.340        | 3.25 | 1.23 |
| Likes to reflect         | 36-O | -0.016 | <b>-0.414</b> | 0.152         | 0.139        | 0.332        | 2.90 | 1.03 |
| Energetic                | 11-E | 0.201  | -0.136        | <b>0.722</b>  | -0.055       | 0.113        | 4.44 | 0.84 |
| Quarrelsome              | 13-A | -0.099 | 0.051         | <b>0.382</b>  | 0.382        | -0.125       | 1.99 | 0.79 |
| Thorough                 | 3-C  | 0.173  | -0.086        | <b>0.745</b>  | -0.058       | -0.098       | 4.45 | 0.82 |
| Perseveres               | 21-C | 0.120  | -0.247        | <b>0.586</b>  | -0.035       | 0.138        | 3.96 | 1.16 |
| Efficient                | 29-C | 0.163  | -0.143        | <b>0.333</b>  | 0.128        | 0.304        | 3.15 | 1.13 |
| Depressed, blue          | 4-N  | -0.327 | 0.315         | <b>-0.345</b> | 0.081        | -0.057       | 2.67 | 1.15 |
| Inventive                | 23-O | 0.255  | -0.173        | <b>0.509</b>  | 0.047        | 0.103        | 4.51 | 0.84 |
| Finds fault              | 2-A  | -0.221 | -0.163        | 0.283         | <b>0.557</b> | -0.179       | 1.95 | 0.57 |
| Rude                     | 22-A | -0.017 | -0.044        | 0.410         | <b>0.459</b> | 0.124        | 2.46 | 1.12 |
| Easily distracted        | 42-C | -0.015 | 0.175         | -0.030        | <b>0.438</b> | 0.094        | 3.43 | 1.09 |
| Relaxed                  | 9-N  | 0.080  | -0.019        | -0.031        | <b>0.419</b> | -0.013       | 2.83 | 1.38 |
| Emotionally stable       | 19-N | 0.255  | -0.173        | -0.130        | <b>0.324</b> | -0.108       | 3.96 | 1.32 |
| Curious                  | 10-O | -0.023 | 0.081         | -0.123        | <b>0.572</b> | 0.145        | 4.01 | 0.87 |
| Sophisticated in arts    | 39-O | 0.212  | -0.268        | -0.132        | <b>0.369</b> | 0.162        | 3.46 | 1.11 |
| Worrisome                | 26-N | 0.110  | 0.155         | 0.066         | 0.008        | <b>0.470</b> | 4.44 | 0.86 |
| Moody                    | 30-N | -0.162 | 0.089         | -0.013        | 0.298        | <b>0.385</b> | 3.60 | 1.02 |
| Likes routine            | 12-O | -0.133 | 0.162         | 0.085         | 0.114        | <b>0.400</b> | 2.45 | 0.93 |
| Likes art                | 17-O | 0.067  | -0.094        | 0.014         | -0.065       | <b>0.632</b> | 3.40 | 1.18 |

---

**Table S7***EFA (Restricted to Five Factors) of Older Individuals Sub-Sample (n=310)*

| Item                                      | Item # | Factor        |               |        |        |        | Mean | Standard Deviation |
|-------------------------------------------|--------|---------------|---------------|--------|--------|--------|------|--------------------|
|                                           |        | 1             | 2             | 3      | 4      | 5      |      |                    |
| <i>Variance explained (post-rotation)</i> |        | 15.14%        | 12.49%        | 5.05%  | 4.08%  | 3.92%  |      |                    |
| <i>Internal reliability (C. alpha)</i>    |        | 0.87          | 0.86          | 0.42   | 0.31   | 0.13   |      |                    |
| Is talkative                              | 1-E    | <b>0.681</b>  | 0.122         | 0.004  | -0.094 | -0.112 | 3.71 | 1.14               |
| Reserved                                  | 6-E    | <b>0.553</b>  | 0.199         | 0.019  | 0.165  | 0.124  | 3.25 | 1.15               |
| Shy                                       | 27-E   | <b>-0.743</b> | -0.020        | 0.146  | 0.172  | 0.118  | 2.47 | 1.08               |
| Generates enthusiasm                      | 32-E   | <b>0.627</b>  | 0.257         | 0.021  | 0.051  | 0.118  | 2.82 | 1.23               |
| Assertive                                 | 40-E   | <b>0.681</b>  | 0.142         | 0.155  | -0.063 | -0.157 | 3.47 | 1.19               |
| Outgoing                                  | 43-E   | <b>0.612</b>  | 0.131         | -0.021 | 0.000  | 0.146  | 2.80 | 1.12               |
| Trusting                                  | 24-A   | <b>0.662</b>  | 0.074         | -0.031 | 0.022  | 0.155  | 3.43 | 1.07               |
| Forgiving                                 | 28-A   | <b>0.643</b>  | 0.055         | -0.153 | 0.055  | 0.106  | 3.05 | 1.27               |
| Cold or aloof                             | 33-A   | <b>-0.480</b> | -0.188        | -0.029 | 0.012  | 0.389  | 2.30 | 1.04               |
| Considerate                               | 37-A   | <b>0.399</b>  | 0.181         | -0.148 | 0.314  | 0.170  | 4.22 | 0.90               |
| Disorganized                              | 18-C   | <b>-0.439</b> | -0.195        | 0.121  | 0.117  | 0.315  | 2.51 | 0.95               |
| Makes plans                               | 34-C   | <b>0.468</b>  | 0.336         | -0.060 | 0.184  | -0.035 | 3.93 | 0.99               |
| Emotionally stable                        | 19-N   | <b>0.333</b>  | -0.116        | 0.170  | -0.140 | 0.125  | 3.96 | 1.32               |
| Original                                  | 5-O    | <b>0.661</b>  | 0.272         | -0.119 | 0.040  | 0.070  | 2.91 | 1.17               |
| Ingenious                                 | 31-O   | <b>0.576</b>  | 0.342         | -0.026 | 0.075  | 0.103  | 2.89 | 1.19               |
| Sophisticated in arts                     | 39-O   | <b>0.373</b>  | -0.006        | 0.118  | -0.024 | 0.272  | 3.42 | 1.11               |
| Energetic                                 | 11-E   | 0.145         | <b>0.791</b>  | -0.140 | 0.035  | -0.015 | 3.93 | 1.04               |
| Quiet                                     | 16-E   | -0.278        | <b>-0.353</b> | 0.083  | 0.267  | 0.135  | 3.64 | 1.28               |
| Helpful, unselfish                        | 7-A    | 0.324         | <b>0.427</b>  | -0.291 | 0.117  | 0.249  | 3.70 | 1.21               |
| Rude                                      | 22-A   | -0.024        | <b>0.492</b>  | 0.384  | -0.184 | 0.051  | 1.89 | 0.92               |
| Cooperative                               | 41-A   | 0.354         | <b>0.434</b>  | -0.277 | 0.200  | 0.406  | 3.69 | 1.18               |
| Thorough                                  | 3-C    | 0.162         | <b>0.698</b>  | -0.119 | -0.061 | -0.030 | 3.96 | 1.09               |

|                          |      |        |               |              |               |               |      |      |
|--------------------------|------|--------|---------------|--------------|---------------|---------------|------|------|
| Reliable worker          | 14-C | 0.366  | <b>0.551</b>  | -0.198       | 0.072         | 0.278         | 3.41 | 1.16 |
| Perseveres               | 21-C | 0.221  | <b>0.724</b>  | -0.113       | 0.056         | -0.081        | 3.43 | 1.27 |
| Lazy                     | 25-C | -0.407 | <b>-0.452</b> | 0.235        | 0.063         | 0.132         | 2.09 | 0.88 |
| Efficient                | 29-C | 0.101  | <b>0.513</b>  | -0.020       | 0.091         | 0.035         | 2.89 | 1.09 |
| Depressed, blue          | 4-N  | -0.364 | <b>-0.454</b> | 0.166        | 0.057         | 0.231         | 2.90 | 1.21 |
| Tense                    | 15-N | -0.257 | <b>-0.500</b> | 0.094        | 0.325         | 0.024         | 3.09 | 1.34 |
| Calm in tense situations | 35-N | -0.024 | <b>-0.319</b> | -0.134       | 0.120         | 0.020         | 4.53 | 0.92 |
| Inventive                | 23-O | 0.178  | <b>0.663</b>  | -0.035       | 0.042         | 0.063         | 4.08 | 0.99 |
| Likes to reflect         | 36-O | 0.108  | <b>0.452</b>  | 0.258        | -0.093        | -0.136        | 2.64 | 1.00 |
| Finds fault              | 2-A  | -0.164 | 0.150         | <b>0.406</b> | -0.375        | -0.056        | 1.92 | 0.53 |
| Easily distracted        | 42-C | -0.035 | -0.107        | <b>0.602</b> | 0.077         | -0.010        | 3.50 | 1.13 |
| Moody                    | 30-N | -0.068 | -0.083        | <b>0.534</b> | 0.196         | 0.009         | 3.65 | 1.04 |
| Curious                  | 10-O | 0.124  | -0.144        | <b>0.538</b> | 0.063         | 0.045         | 4.04 | 0.90 |
| Likes routine            | 12-O | -0.147 | 0.299         | <b>0.315</b> | 0.056         | 0.012         | 2.39 | 0.93 |
| Quarrelsome              | 13-A | -0.208 | 0.331         | 0.203        | <b>-0.381</b> | 0.244         | 1.90 | 0.75 |
| Careless                 | 8-C  | -0.082 | -0.145        | 0.127        | <b>0.461</b>  | 0.095         | 3.46 | 1.06 |
| Worrisome                | 26-N | 0.045  | 0.128         | 0.073        | <b>0.560</b>  | -0.019        | 4.43 | 0.87 |
| Nervous easily           | 38-N | -0.276 | -0.309        | 0.137        | <b>0.351</b>  | -0.134        | 3.72 | 1.25 |
| Likes art                | 17-O | 0.075  | 0.201         | 0.249        | <b>0.409</b>  | -0.365        | 3.38 | 1.16 |
| Relaxed                  | 9-N  | 0.083  | -0.001        | 0.221        | -0.109        | <b>0.364</b>  | 2.84 | 1.36 |
| Few artistic interests   | 44-O | -0.347 | -0.053        | 0.161        | -0.137        | <b>-0.614</b> | 2.84 | 1.35 |

**Table S8***EFA (Restricted to Five Factors) of Younger Individuals Sub-Sample (n=321)*

| Item                                      | Item # | Factor        |              |        |        |        | Mean | Standard Deviation |
|-------------------------------------------|--------|---------------|--------------|--------|--------|--------|------|--------------------|
|                                           |        | 1             | 2            | 3      | 4      | 5      |      |                    |
| <i>Variance explained (post-rotation)</i> |        | 15.09%        | 9.00%        | 5.01%  | 4.54%  | 4.26%  |      |                    |
| <i>Internal reliability (C. alpha)</i>    |        | 0.89          | 0.73         | 0.37   | 0.39   | 0.42   |      |                    |
| Is talkative                              | 1-E    | <b>0.583</b>  | 0.293        | -0.262 | -0.154 | 0.009  | 3.69 | 1.14               |
| Reserved                                  | 6-E    | <b>0.643</b>  | 0.043        | 0.054  | 0.089  | 0.093  | 3.69 | 1.15               |
| Shy                                       | 27-E   | <b>-0.554</b> | -0.307       | 0.272  | 0.181  | 0.027  | 2.76 | 1.06               |
| Generates enthusiasm                      | 32-E   | <b>0.523</b>  | 0.280        | -0.280 | -0.019 | 0.022  | 2.89 | 1.18               |
| Assertive                                 | 40-E   | <b>0.440</b>  | 0.432        | -0.230 | -0.160 | 0.073  | 3.38 | 1.24               |
| Outgoing                                  | 43-E   | <b>0.596</b>  | 0.306        | -0.149 | 0.009  | -0.045 | 2.90 | 1.15               |
| Helpful, unselfish                        | 7-A    | <b>0.527</b>  | 0.254        | 0.229  | 0.040  | 0.024  | 3.99 | 1.09               |
| Trusting                                  | 24-A   | <b>0.604</b>  | 0.072        | -0.012 | -0.271 | 0.081  | 3.44 | 0.98               |
| Forgiving                                 | 28-A   | <b>0.610</b>  | 0.098        | 0.053  | -0.193 | -0.024 | 3.31 | 1.28               |
| Considerate                               | 37-A   | <b>0.565</b>  | 0.050        | 0.050  | -0.205 | -0.099 | 4.19 | 0.88               |
| Cooperative                               | 41-A   | <b>0.578</b>  | 0.235        | 0.166  | 0.219  | 0.002  | 4.10 | 1.02               |
| Reliable worker                           | 14-C   | <b>0.471</b>  | 0.430        | 0.206  | -0.095 | -0.117 | 3.61 | 1.11               |
| Disorganized                              | 18-C   | <b>-0.310</b> | -0.129       | 0.253  | 0.185  | 0.106  | 2.49 | 0.92               |
| Makes plans                               | 34-C   | <b>0.643</b>  | -0.013       | -0.040 | -0.142 | -0.033 | 4.06 | 0.97               |
| Depressed, blue                           | 4-N    | <b>-0.480</b> | 0.076        | 0.224  | 0.323  | -0.165 | 2.74 | 1.14               |
| Original                                  | 5-O    | <b>0.708</b>  | 0.076        | -0.186 | 0.064  | -0.005 | 3.11 | 1.16               |
| Likes art                                 | 17-O   | <b>0.240</b>  | 0.029        | -0.064 | 0.176  | 0.230  | 3.26 | 1.22               |
| Ingenious                                 | 31-O   | <b>0.573</b>  | 0.285        | -0.214 | -0.090 | -0.080 | 3.02 | 1.23               |
| Few artistic interests                    | 44-O   | <b>-0.469</b> | -0.292       | -0.154 | -0.235 | -0.017 | 2.57 | 1.32               |
| Energetic                                 | 11-E   | 0.293         | <b>0.425</b> | 0.192  | -0.359 | 0.026  | 4.36 | 0.82               |
| Thorough                                  | 3-C    | 0.406         | <b>0.413</b> | 0.186  | -0.247 | 0.071  | 4.19 | 0.90               |
| Perseveres                                | 21-C   | 0.221         | <b>0.629</b> | 0.092  | -0.085 | 0.034  | 3.62 | 1.21               |

|                          |      |        |               |              |               |              |      |      |
|--------------------------|------|--------|---------------|--------------|---------------|--------------|------|------|
| Efficient                | 29-C | 0.275  | <b>0.319</b>  | -0.152       | 0.042         | 0.260        | 3.01 | 1.11 |
| Relaxed                  | 9-N  | -0.060 | <b>0.348</b>  | 0.065        | -0.096        | 0.163        | 2.72 | 1.35 |
| Tense                    | 15-N | -0.135 | <b>-0.603</b> | 0.117        | 0.023         | 0.278        | 3.04 | 1.27 |
| Nervous easily           | 38-N | -0.180 | <b>-0.561</b> | 0.212        | 0.057         | 0.199        | 3.82 | 1.25 |
| Inventive                | 23-O | 0.297  | <b>0.456</b>  | 0.059        | -0.265        | 0.101        | 4.13 | 1.07 |
| Likes to reflect         | 36-O | 0.177  | <b>0.399</b>  | -0.317       | 0.254         | 0.228        | 2.66 | 0.98 |
| Sophisticated in arts    | 39-O | 0.174  | <b>0.577</b>  | -0.109       | 0.111         | 0.138        | 2.97 | 1.15 |
| Quiet                    | 16-E | -0.200 | -0.048        | <b>0.615</b> | -0.066        | -0.128       | 3.55 | 1.23 |
| Careless                 | 8-C  | 0.096  | -0.282        | <b>0.391</b> | 0.244         | 0.139        | 3.71 | 0.97 |
| Worrisome                | 26-N | 0.197  | -0.031        | <b>0.316</b> | -0.126        | 0.159        | 4.42 | 0.90 |
| Calm in tense situations | 35-N | -0.112 | 0.010         | <b>0.532</b> | 0.028         | 0.023        | 4.58 | 0.89 |
| Likes routine            | 12-O | 0.021  | 0.130         | <b>0.238</b> | 0.069         | 0.079        | 2.39 | 0.88 |
| Cold or aloof            | 33-A | -0.060 | -0.220        | 0.331        | <b>0.580</b>  | -0.053       | 2.62 | 1.10 |
| Lazy                     | 25-C | -0.298 | -0.305        | 0.104        | <b>0.489</b>  | 0.123        | 2.16 | 0.74 |
| Emotionally stable       | 19-N | 0.184  | -0.020        | 0.057        | <b>-0.440</b> | 0.017        | 3.93 | 1.32 |
| Finds fault              | 2-A  | -0.136 | 0.096         | -0.110       | -0.211        | <b>0.542</b> | 1.97 | 0.57 |
| Quarrelsome              | 13-A | 0.014  | 0.023         | -0.149       | 0.201         | <b>0.528</b> | 2.07 | 0.82 |
| Rude                     | 22-A | 0.158  | 0.423         | 0.096        | -0.061        | <b>0.442</b> | 2.30 | 1.04 |
| Easily distracted        | 42-C | 0.005  | -0.165        | 0.190        | -0.074        | <b>0.373</b> | 3.55 | 1.05 |
| Moody                    | 30-N | -0.140 | 0.088         | 0.110        | -0.269        | <b>0.387</b> | 3.57 | 1.03 |
| Curious                  | 10-O | 0.022  | 0.005         | 0.185        | 0.115         | <b>0.491</b> | 3.97 | 0.90 |



**Table S9***EFA (Restricted to Five Factors) of Educated Sub-Sample (n=227)*

| Item                                      | Item # | Factor        |               |        |        |        | Mean | Standard Deviation |
|-------------------------------------------|--------|---------------|---------------|--------|--------|--------|------|--------------------|
|                                           |        | 1             | 2             | 3      | 4      | 5      |      |                    |
| <i>Variance explained (post-rotation)</i> |        | 12.20%        | 8.21%         | 7.64%  | 4.84%  | 4.37%  |      |                    |
| <i>Internal reliability (C. alpha)</i>    |        | 0.87          | 0.75          | 0.63   | 0.42   | 0.30   |      |                    |
| Is talkative                              | 1-E    | <b>0.582</b>  | 0.099         | 0.294  | -0.235 | 0.091  | 3.96 | 1.07               |
| Reserved                                  | 6-E    | <b>0.556</b>  | 0.121         | 0.015  | 0.093  | 0.187  | 3.80 | 1.10               |
| Shy                                       | 27-E   | <b>-0.468</b> | -0.119        | -0.452 | 0.294  | -0.018 | 2.45 | 1.04               |
| Generates enthusiasm                      | 32-E   | <b>0.525</b>  | 0.179         | 0.296  | -0.215 | 0.118  | 3.10 | 1.23               |
| Assertive                                 | 40-E   | <b>0.444</b>  | 0.288         | 0.409  | -0.233 | 0.109  | 3.69 | 1.21               |
| Outgoing                                  | 43-E   | <b>0.599</b>  | 0.230         | 0.137  | -0.062 | 0.054  | 3.13 | 1.16               |
| Helpful, unselfish                        | 7-A    | <b>0.417</b>  | 0.371         | 0.059  | 0.114  | -0.232 | 4.22 | 0.98               |
| Forgiving                                 | 28-A   | <b>0.479</b>  | 0.267         | 0.263  | 0.100  | -0.118 | 3.49 | 1.27               |
| Considerate                               | 37-A   | <b>0.394</b>  | 0.096         | 0.390  | 0.056  | -0.146 | 4.42 | 0.77               |
| Cooperative                               | 41-A   | <b>0.615</b>  | 0.150         | -0.180 | -0.044 | -0.010 | 4.31 | 0.91               |
| Makes plans                               | 34-C   | <b>0.457</b>  | 0.100         | 0.230  | 0.059  | -0.225 | 4.28 | 0.87               |
| Original                                  | 5-O    | <b>0.665</b>  | 0.140         | 0.148  | -0.094 | 0.053  | 3.45 | 1.17               |
| Ingenious                                 | 31-O   | <b>0.510</b>  | 0.239         | 0.284  | -0.114 | 0.036  | 3.39 | 1.27               |
| Sophisticated in arts                     | 39-O   | <b>0.437</b>  | 0.210         | 0.067  | -0.278 | 0.191  | 3.20 | 1.15               |
| Few artistic interests                    | 44-O   | <b>-0.666</b> | -0.117        | 0.333  | -0.094 | 0.007  | 2.43 | 1.33               |
| Energetic                                 | 11-E   | 0.304         | <b>0.507</b>  | 0.216  | 0.204  | 0.009  | 4.40 | 0.76               |
| Rude                                      | 22-A   | 0.074         | <b>0.458</b>  | 0.073  | 0.034  | 0.353  | 2.24 | 1.02               |
| Thorough                                  | 3-C    | 0.255         | <b>0.590</b>  | 0.099  | 0.001  | -0.003 | 4.30 | 0.89               |
| Reliable worker                           | 14-C   | 0.363         | <b>0.587</b>  | 0.112  | 0.053  | -0.176 | 3.78 | 1.06               |
| Perseveres                                | 21-C   | 0.246         | <b>0.520</b>  | 0.149  | -0.041 | 0.094  | 3.72 | 1.21               |
| Relaxed                                   | 9-N    | 0.007         | <b>0.403</b>  | -0.075 | 0.075  | 0.164  | 2.68 | 1.34               |
| Tense                                     | 15-N   | -0.098        | <b>-0.592</b> | -0.089 | 0.345  | 0.110  | 2.84 | 1.21               |

|                          |      |        |               |               |               |              |      |      |
|--------------------------|------|--------|---------------|---------------|---------------|--------------|------|------|
| Emotionally stable       | 19-N | -0.048 | <b>0.344</b>  | 0.326         | 0.129         | -0.126       | 4.11 | 1.23 |
| Nervous easily           | 38-N | -0.147 | <b>-0.551</b> | -0.191        | 0.312         | 0.031        | 3.64 | 1.26 |
| Inventive                | 23-O | 0.276  | <b>0.556</b>  | 0.175         | -0.046        | 0.020        | 4.29 | 0.99 |
| Trusting                 | 24-A | 0.473  | 0.152         | <b>0.477</b>  | 0.141         | 0.119        | 3.70 | 0.97 |
| Cold or aloof            | 33-A | 0.033  | -0.123        | <b>-0.721</b> | 0.085         | -0.115       | 2.46 | 1.11 |
| Careless                 | 8-C  | 0.053  | -0.089        | <b>-0.519</b> | 0.192         | 0.090        | 3.62 | 0.99 |
| Disorganized             | 18-C | -0.185 | -0.165        | <b>-0.314</b> | 0.001         | -0.047       | 2.32 | 0.82 |
| Lazy                     | 25-C | -0.243 | -0.196        | <b>-0.588</b> | 0.057         | -0.093       | 2.01 | 0.67 |
| Depressed, blue          | 4-N  | -0.221 | -0.030        | <b>-0.454</b> | -0.044        | 0.025        | 2.67 | 1.05 |
| Quiet                    | 16-E | -0.132 | 0.090         | -0.223        | <b>0.583</b>  | -0.063       | 3.33 | 1.29 |
| Easily distracted        | 42-C | -0.098 | 0.048         | 0.124         | <b>0.478</b>  | 0.309        | 3.50 | 1.03 |
| Worrisome                | 26-N | 0.173  | -0.044        | 0.152         | <b>0.445</b>  | 0.003        | 4.48 | 0.89 |
| Calm in tense situations | 35-N | -0.069 | -0.072        | -0.162        | <b>0.445</b>  | 0.155        | 4.51 | 0.94 |
| Likes routine            | 12-O | 0.017  | 0.106         | -0.171        | <b>0.200</b>  | 0.117        | 2.32 | 0.81 |
| Likes to reflect         | 36-O | 0.104  | 0.132         | 0.059         | <b>-0.453</b> | 0.401        | 2.74 | 1.01 |
| Finds fault              | 2-A  | -0.188 | 0.117         | 0.138         | 0.141         | <b>0.492</b> | 1.96 | 0.63 |
| Quarrelsome              | 13-A | 0.094  | -0.051        | -0.087        | -0.094        | <b>0.438</b> | 2.07 | 0.84 |
| Efficient                | 29-C | 0.195  | 0.249         | 0.072         | -0.111        | <b>0.253</b> | 3.08 | 1.08 |
| Moody                    | 30-N | -0.006 | 0.040         | 0.114         | 0.238         | <b>0.504</b> | 3.54 | 1.02 |
| Curious                  | 10-O | 0.042  | -0.001        | -0.199        | 0.134         | <b>0.462</b> | 4.00 | 0.84 |
| Likes art                | 17-O | 0.273  | -0.152        | 0.105         | -0.072        | <b>0.308</b> | 3.36 | 1.19 |

**Table S10***EFA (Restricted to Five Factors) of Uneducated Sub-Sample (n=365)*

| Item                                      | Item # | Factor        |              |        |        |        | Mean | Standard Deviation |
|-------------------------------------------|--------|---------------|--------------|--------|--------|--------|------|--------------------|
|                                           |        | 1             | 2            | 3      | 4      | 5      |      |                    |
| <i>Variance explained (post-rotation)</i> |        | 13.35%        | 10.72%       | 5.75%  | 4.73%  | 4.48%  |      |                    |
| <i>Internal reliability (C. alpha)</i>    |        | 0.86          | 0.83         | 0.59   | 0.28   | 0.40   |      |                    |
| Is talkative                              | 1-E    | <b>0.684</b>  | 0.056        | -0.237 | -0.114 | 0.005  | 3.56 | 1.15               |
| Reserved                                  | 6-E    | <b>0.581</b>  | 0.259        | 0.218  | 0.097  | 0.080  | 3.27 | 1.17               |
| Shy                                       | 27-E   | <b>-0.659</b> | -0.009       | 0.345  | -0.010 | 0.054  | 2.72 | 1.10               |
| Generates enthusiasm                      | 32-E   | <b>0.561</b>  | 0.234        | -0.139 | -0.006 | 0.007  | 2.73 | 1.16               |
| Assertive                                 | 40-E   | <b>0.554</b>  | 0.019        | -0.375 | -0.103 | 0.209  | 3.26 | 1.20               |
| Outgoing                                  | 43-E   | <b>0.635</b>  | 0.089        | -0.104 | 0.002  | -0.010 | 2.67 | 1.09               |
| Trusting                                  | 24-A   | <b>0.602</b>  | 0.077        | -0.043 | 0.132  | 0.027  | 3.32 | 1.03               |
| Forgiving                                 | 28-A   | <b>0.631</b>  | 0.121        | 0.118  | 0.106  | -0.092 | 3.01 | 1.27               |
| Considerate                               | 37-A   | <b>0.411</b>  | 0.213        | -0.011 | 0.404  | 0.053  | 4.07 | 0.95               |
| Disorganized                              | 18-C   | <b>-0.377</b> | -0.040       | 0.310  | 0.173  | 0.246  | 2.61 | 0.98               |
| Makes plans                               | 34-C   | <b>0.541</b>  | 0.277        | -0.015 | 0.025  | 0.063  | 3.83 | 1.02               |
| Depressed, blue                           | 4-N    | <b>-0.477</b> | -0.342       | 0.017  | 0.283  | 0.097  | 2.90 | 1.23               |
| Emotionally stable                        | 19-N   | <b>0.302</b>  | -0.173       | -0.039 | 0.125  | 0.231  | 3.81 | 1.37               |
| Original                                  | 5-O    | <b>0.678</b>  | 0.201        | -0.018 | -0.014 | -0.069 | 2.76 | 1.09               |
| Ingenious                                 | 31-O   | <b>0.557</b>  | 0.267        | -0.202 | 0.018  | -0.025 | 2.72 | 1.11               |
| Energetic                                 | 11-E   | 0.089         | <b>0.741</b> | -0.116 | -0.110 | -0.076 | 4.01 | 1.02               |
| Helpful, unselfish                        | 7-A    | 0.281         | <b>0.552</b> | 0.002  | 0.262  | -0.035 | 3.67 | 1.19               |
| Rude                                      | 22-A   | 0.014         | <b>0.462</b> | 0.023  | -0.319 | 0.338  | 1.99 | 0.97               |
| Cooperative                               | 41-A   | 0.323         | <b>0.585</b> | 0.061  | 0.297  | -0.074 | 3.65 | 1.16               |
| Thorough                                  | 3-C    | 0.163         | <b>0.701</b> | -0.047 | -0.146 | -0.058 | 3.99 | 1.01               |
| Reliable worker                           | 14-C   | 0.375         | <b>0.591</b> | 0.011  | 0.097  | -0.059 | 3.37 | 1.15               |
| Perseveres                                | 21-C   | 0.105         | <b>0.692</b> | -0.279 | -0.055 | -0.037 | 3.42 | 1.24               |

|                          |      |        |              |               |               |              |      |      |
|--------------------------|------|--------|--------------|---------------|---------------|--------------|------|------|
| Efficient                | 29-C | 0.165  | <b>0.461</b> | -0.140        | -0.083        | 0.187        | 2.90 | 1.12 |
| Inventive                | 23-O | 0.146  | <b>0.598</b> | -0.173        | -0.047        | 0.043        | 4.01 | 1.03 |
| Likes to reflect         | 36-O | 0.183  | <b>0.329</b> | -0.238        | -0.266        | 0.242        | 2.62 | 0.99 |
| Cold or aloof            | 33-A | -0.278 | -0.072       | <b>0.535</b>  | 0.062         | -0.004       | 2.44 | 1.07 |
| Careless                 | 8-C  | 0.076  | -0.008       | <b>0.546</b>  | 0.106         | 0.123        | 3.57 | 1.05 |
| Lazy                     | 25-C | -0.330 | -0.342       | <b>0.358</b>  | -0.049        | 0.211        | 2.17 | 0.87 |
| Relaxed                  | 9-N  | -0.014 | 0.021        | <b>-0.250</b> | 0.083         | 0.192        | 2.84 | 1.36 |
| Tense                    | 15-N | -0.131 | -0.367       | <b>0.515</b>  | 0.125         | 0.110        | 3.19 | 1.35 |
| Nervous easily           | 38-N | -0.166 | -0.252       | <b>0.520</b>  | -0.015        | 0.104        | 3.83 | 1.24 |
| Sophisticated in arts    | 39-O | 0.127  | 0.060        | <b>-0.515</b> | 0.313         | 0.309        | 3.19 | 1.16 |
| Quiet                    | 16-E | -0.326 | -0.179       | 0.131         | <b>0.441</b>  | 0.116        | 3.75 | 1.21 |
| Finds fault              | 2-A  | -0.181 | 0.023        | -0.115        | <b>-0.494</b> | 0.244        | 1.92 | 0.47 |
| Quarrelsome              | 13-A | -0.159 | 0.310        | 0.198         | <b>-0.517</b> | 0.106        | 1.93 | 0.78 |
| Calm in tense situations | 35-N | -0.160 | -0.087       | 0.003         | <b>0.467</b>  | -0.044       | 4.60 | 0.86 |
| Few artistic interests   | 44-O | -0.299 | -0.229       | 0.009         | <b>-0.392</b> | -0.075       | 2.85 | 1.31 |
| Easily distracted        | 42-C | -0.034 | -0.163       | 0.197         | -0.094        | <b>0.553</b> | 3.53 | 1.12 |
| Worrisome                | 26-N | 0.045  | 0.163        | 0.083         | 0.247         | <b>0.286</b> | 4.43 | 0.85 |
| Moody                    | 30-N | -0.128 | -0.074       | 0.060         | -0.101        | <b>0.436</b> | 3.64 | 1.04 |
| Curious                  | 10-O | 0.065  | -0.136       | -0.008        | 0.010         | <b>0.648</b> | 4.01 | 0.94 |
| Likes routine            | 12-O | -0.095 | 0.241        | -0.158        | 0.027         | <b>0.363</b> | 2.43 | 0.96 |
| Likes art                | 17-O | 0.078  | 0.135        | -0.015        | -0.040        | <b>0.246</b> | 3.31 | 1.20 |

---

**Table S11***EFA (Restricted to Five Factors) of Spanish-Speaking Sub-Sample (n=315)*

| Item                                      | Item # | Factor        |               |        |        |        | Mean | Standard<br>Deviation |
|-------------------------------------------|--------|---------------|---------------|--------|--------|--------|------|-----------------------|
|                                           |        | 1             | 2             | 3      | 4      | 5      |      |                       |
| <i>Variance explained (post-rotation)</i> |        | 12.25%        | 8.48%         | 6.71%  | 4.75%  | 4.52%  |      |                       |
| <i>Internal reliability (C. alpha)</i>    |        | 0.87          | 0.76          | 0.57   | 0.46   | 0.38   |      |                       |
| Is talkative                              | 1-E    | <b>0.640</b>  | 0.080         | -0.210 | 0.255  | -0.066 | 4.02 | 1.03                  |
| Reserved                                  | 6-E    | <b>0.505</b>  | 0.296         | 0.073  | -0.089 | 0.238  | 3.72 | 1.12                  |
| Shy                                       | 27-E   | <b>-0.546</b> | -0.029        | 0.425  | -0.247 | 0.161  | 2.33 | 1.01                  |
| Generates enthusiasm                      | 32-E   | <b>0.548</b>  | 0.268         | -0.195 | 0.215  | 0.084  | 3.13 | 1.24                  |
| Assertive                                 | 40-E   | <b>0.516</b>  | 0.135         | -0.379 | 0.143  | 0.088  | 3.72 | 1.19                  |
| Outgoing                                  | 43-E   | <b>0.640</b>  | 0.106         | 0.105  | 0.183  | -0.096 | 3.20 | 1.14                  |
| Trusting                                  | 24-A   | <b>0.568</b>  | 0.069         | -0.261 | -0.095 | 0.205  | 3.71 | 0.97                  |
| Forgiving                                 | 28-A   | <b>0.608</b>  | 0.254         | -0.175 | -0.110 | 0.009  | 3.44 | 1.28                  |
| Considerate                               | 37-A   | <b>0.509</b>  | 0.113         | -0.215 | -0.123 | -0.052 | 4.40 | 0.78                  |
| Cooperative                               | 41-A   | <b>0.452</b>  | 0.380         | 0.295  | 0.031  | -0.114 | 4.26 | 0.96                  |
| Makes plans                               | 34-C   | <b>0.466</b>  | 0.238         | -0.097 | -0.118 | 0.027  | 4.28 | 0.85                  |
| Depressed, blue                           | 4-N    | <b>-0.292</b> | -0.224        | 0.273  | -0.064 | -0.121 | 2.67 | 1.10                  |
| Original                                  | 5-O    | <b>0.647</b>  | 0.207         | -0.045 | 0.008  | 0.014  | 3.39 | 1.16                  |
| Ingenious                                 | 31-O   | <b>0.562</b>  | 0.292         | -0.203 | 0.100  | 0.034  | 3.34 | 1.28                  |
| Sophisticated in arts                     | 39-O   | <b>0.452</b>  | -0.048        | -0.086 | 0.353  | -0.037 | 3.22 | 1.15                  |
| Few artistic interests                    | 44-O   | <b>-0.571</b> | -0.074        | -0.421 | 0.014  | 0.187  | 2.46 | 1.32                  |
| Energetic                                 | 11-E   | 0.183         | <b>0.701</b>  | -0.051 | 0.019  | 0.115  | 4.37 | 0.81                  |
| Helpful, unselfish                        | 7-A    | 0.259         | <b>0.608</b>  | 0.069  | -0.059 | -0.028 | 4.22 | 0.98                  |
| Thorough                                  | 3-C    | 0.144         | <b>0.709</b>  | -0.126 | 0.002  | 0.093  | 4.31 | 0.85                  |
| Reliable worker                           | 14-C   | 0.336         | <b>0.586</b>  | 0.045  | -0.083 | -0.177 | 3.90 | 1.02                  |
| Perseveres                                | 21-C   | 0.091         | <b>0.592</b>  | -0.161 | 0.172  | -0.047 | 3.77 | 1.21                  |
| Tense                                     | 15-N   | -0.079        | <b>-0.422</b> | 0.291  | -0.198 | 0.298  | 2.78 | 1.17                  |

|                          |      |        |              |               |               |              |      |      |
|--------------------------|------|--------|--------------|---------------|---------------|--------------|------|------|
| Inventive                | 23-O | 0.160  | <b>0.553</b> | -0.131        | 0.109         | 0.042        | 4.36 | 0.89 |
| Cold or aloof            | 33-A | -0.126 | -0.033       | <b>0.660</b>  | -0.172        | -0.163       | 2.33 | 1.06 |
| Careless                 | 8-C  | -0.005 | -0.037       | <b>0.553</b>  | -0.110        | 0.105        | 3.57 | 1.02 |
| Disorganized             | 18-C | -0.106 | -0.061       | <b>0.464</b>  | 0.003         | 0.051        | 2.30 | 0.83 |
| Lazy                     | 25-C | -0.277 | -0.230       | <b>0.565</b>  | 0.001         | 0.026        | 1.97 | 0.72 |
| Emotionally stable       | 19-N | 0.223  | 0.025        | <b>-0.381</b> | -0.197        | 0.057        | 4.03 | 1.29 |
| Nervous easily           | 38-N | -0.142 | -0.337       | <b>0.364</b>  | -0.192        | 0.221        | 3.59 | 1.24 |
| Likes routine            | 12-O | 0.003  | 0.043        | <b>0.201</b>  | 0.092         | 0.196        | 2.34 | 0.84 |
| Quiet                    | 16-E | -0.133 | 0.024        | 0.211         | <b>-0.563</b> | 0.150        | 3.39 | 1.29 |
| Quarrelsome              | 13-A | -0.142 | 0.076        | 0.176         | <b>0.366</b>  | 0.207        | 2.03 | 0.83 |
| Efficient                | 29-C | 0.104  | 0.305        | 0.034         | <b>0.356</b>  | 0.122        | 3.12 | 1.11 |
| Calm in tense situations | 35-N | -0.028 | -0.072       | 0.088         | <b>-0.451</b> | 0.181        | 4.47 | 0.98 |
| Likes to reflect         | 36-O | 0.065  | 0.073        | -0.018        | <b>0.636</b>  | 0.148        | 2.80 | 1.03 |
| Finds fault              | 2-A  | -0.079 | 0.043        | -0.213        | 0.153         | <b>0.502</b> | 1.90 | 0.56 |
| Rude                     | 22-A | 0.049  | 0.365        | 0.074         | 0.291         | <b>0.405</b> | 2.25 | 1.06 |
| Easily distracted        | 42-C | -0.118 | -0.002       | 0.032         | -0.122        | <b>0.505</b> | 3.46 | 1.03 |
| Relaxed                  | 9-N  | 0.103  | 0.030        | -0.084        | -0.003        | <b>0.173</b> | 2.76 | 1.34 |
| Worrisome                | 26-N | 0.127  | 0.013        | 0.049         | -0.216        | <b>0.279</b> | 4.43 | 0.90 |
| Moody                    | 30-N | -0.160 | 0.015        | 0.021         | 0.027         | <b>0.487</b> | 3.61 | 1.04 |
| Curious                  | 10-O | 0.126  | -0.118       | 0.046         | -0.103        | <b>0.453</b> | 4.01 | 0.89 |
| Likes art                | 17-O | 0.105  | -0.036       | 0.159         | 0.188         | <b>0.294</b> | 3.40 | 1.16 |

**Table S12***EFA (Restricted to Five Factors) of Non-Spanish Speaking Sub-Sample (n=280)*

| Item                                      | Item # | Factor        |               |        |        |        | Mean | Standard Deviation |
|-------------------------------------------|--------|---------------|---------------|--------|--------|--------|------|--------------------|
|                                           |        | 1             | 2             | 3      | 4      | 5      |      |                    |
| <i>Variance explained (post-rotation)</i> |        | 11.04%        | 8.83%         | 7.59%  | 5.15%  | 4.82%  |      |                    |
| <i>Internal reliability (C. alpha)</i>    |        | 0.82          | 0.77          | 0.72   | 0.51   | 0.40   |      |                    |
| Is talkative                              | 1-E    | <b>0.674</b>  | 0.026         | 0.109  | 0.092  | 0.069  | 3.35 | 1.14               |
| Quiet                                     | 16-E   | <b>-0.390</b> | -0.345        | 0.067  | 0.127  | 0.125  | 3.80 | 1.18               |
| Shy                                       | 27-E   | <b>-0.633</b> | 0.078         | -0.176 | -0.157 | 0.040  | 2.95 | 1.07               |
| Generates enthusiasm                      | 32-E   | <b>0.513</b>  | 0.092         | 0.240  | 0.065  | -0.060 | 2.58 | 1.09               |
| Assertive                                 | 40-E   | <b>0.655</b>  | 0.093         | -0.035 | 0.260  | 0.173  | 3.09 | 1.16               |
| Outgoing                                  | 43-E   | <b>0.629</b>  | 0.003         | 0.153  | 0.089  | 0.000  | 2.44 | 0.98               |
| Trusting                                  | 24-A   | <b>0.488</b>  | -0.033        | 0.407  | -0.015 | 0.058  | 3.19 | 1.00               |
| Disorganized                              | 18-C   | <b>-0.505</b> | -0.110        | 0.026  | -0.076 | 0.269  | 2.74 | 1.00               |
| Makes plans                               | 34-C   | <b>0.405</b>  | 0.189         | 0.340  | -0.056 | -0.039 | 3.70 | 1.02               |
| Depressed, blue                           | 4-N    | <b>-0.419</b> | -0.415        | -0.160 | 0.120  | 0.168  | 2.95 | 1.23               |
| Original                                  | 5-O    | <b>0.637</b>  | 0.121         | 0.262  | -0.024 | -0.039 | 2.61 | 1.02               |
| Likes art                                 | 17-O   | <b>0.265</b>  | 0.126         | 0.010  | 0.024  | 0.139  | 3.22 | 1.24               |
| Ingenious                                 | 31-O   | <b>0.501</b>  | 0.167         | 0.188  | 0.077  | -0.138 | 2.56 | 0.98               |
| Energetic                                 | 11-E   | 0.070         | <b>0.620</b>  | 0.214  | 0.188  | -0.276 | 3.93 | 1.04               |
| Finds fault                               | 2-A    | -0.111        | <b>0.406</b>  | -0.365 | -0.079 | 0.214  | 1.96 | 0.51               |
| Quarrelsome                               | 13-A   | -0.054        | <b>0.581</b>  | -0.102 | -0.248 | 0.217  | 1.93 | 0.75               |
| Rude                                      | 22-A   | -0.011        | <b>0.615</b>  | 0.041  | 0.016  | 0.206  | 1.90 | 0.89               |
| Thorough                                  | 3-C    | 0.085         | <b>0.632</b>  | 0.240  | 0.111  | -0.173 | 3.86 | 1.05               |
| Perseveres                                | 21-C   | 0.147         | <b>0.591</b>  | 0.255  | 0.313  | -0.135 | 3.26 | 1.22               |
| Efficient                                 | 29-C   | 0.212         | <b>0.417</b>  | 0.215  | 0.141  | 0.038  | 2.80 | 1.08               |
| Tense                                     | 15-N   | -0.271        | <b>-0.427</b> | 0.080  | -0.321 | 0.176  | 3.34 | 1.38               |
| Calm in tense situations                  | 35-N   | -0.249        | <b>-0.338</b> | 0.275  | 0.239  | -0.010 | 4.67 | 0.76               |

|                        |      |        |              |               |               |              |      |      |
|------------------------|------|--------|--------------|---------------|---------------|--------------|------|------|
| Inventive              | 23-O | 0.108  | <b>0.477</b> | 0.242         | 0.296         | -0.098       | 3.82 | 1.10 |
| Likes to reflect       | 36-O | 0.263  | <b>0.424</b> | -0.012        | 0.181         | 0.128        | 2.49 | 0.92 |
| Reserved               | 6-E  | 0.397  | 0.116        | <b>0.496</b>  | -0.172        | 0.099        | 3.21 | 1.16 |
| Helpful, unselfish     | 7-A  | 0.077  | 0.151        | <b>0.570</b>  | 0.164         | -0.220       | 3.51 | 1.19 |
| Forgiving              | 28-A | 0.385  | -0.003       | <b>0.436</b>  | -0.217        | -0.065       | 2.91 | 1.24 |
| Considerate            | 37-A | 0.200  | 0.003        | <b>0.516</b>  | -0.030        | -0.040       | 3.99 | 0.98 |
| Cooperative            | 41-A | 0.131  | 0.262        | <b>0.607</b>  | 0.031         | -0.203       | 3.51 | 1.15 |
| Reliable worker        | 14-C | 0.173  | 0.403        | <b>0.473</b>  | 0.154         | -0.130       | 3.13 | 1.11 |
| Worrisome              | 26-N | 0.048  | 0.086        | <b>0.338</b>  | -0.051        | 0.184        | 4.46 | 0.83 |
| Few artistic interests | 44-O | -0.087 | -0.036       | <b>-0.517</b> | -0.276        | -0.077       | 2.95 | 1.29 |
| Cold or aloof          | 33-A | -0.341 | -0.012       | 0.092         | <b>-0.475</b> | 0.118        | 2.62 | 1.11 |
| Careless               | 8-C  | -0.072 | -0.068       | 0.237         | <b>-0.462</b> | 0.113        | 3.61 | 1.04 |
| Lazy                   | 25-C | -0.284 | -0.267       | -0.209        | <b>-0.324</b> | 0.264        | 2.27 | 0.85 |
| Relaxed                | 9-N  | -0.053 | 0.080        | 0.082         | <b>0.318</b>  | 0.184        | 2.80 | 1.36 |
| Nervous easily         | 38-N | -0.333 | -0.224       | -0.002        | <b>-0.369</b> | 0.125        | 3.95 | 1.24 |
| Likes routine          | 12-O | -0.095 | 0.241        | 0.104         | <b>0.349</b>  | 0.189        | 2.43 | 0.95 |
| Sophisticated in arts  | 39-O | 0.144  | -0.036       | 0.186         | <b>0.643</b>  | 0.169        | 3.14 | 1.16 |
| Easily distracted      | 42-C | -0.056 | -0.015       | 0.001         | -0.027        | <b>0.629</b> | 3.56 | 1.14 |
| Emotionally stable     | 19-N | 0.142  | -0.116       | 0.203         | 0.013         | <b>0.257</b> | 3.81 | 1.36 |
| Moody                  | 30-N | -0.059 | 0.004        | -0.108        | 0.120         | <b>0.497</b> | 3.56 | 1.03 |
| Curious                | 10-O | 0.022  | 0.034        | -0.081        | 0.004         | <b>0.688</b> | 3.99 | 0.93 |



**Table S13***EFA of non reverse-scored items from Extraversion, Agreeableness, and Conscientiousness*

| Item                                      | Item # | Factor       |              |              |
|-------------------------------------------|--------|--------------|--------------|--------------|
|                                           |        | 1            | 2            | 3            |
| <i>Variance explained (post-rotation)</i> |        | 20.25%       | 17.58%       | 14.60%       |
| <i>Internal reliability (C. alpha)</i>    |        | 0.81         | 0.76         | 0.67         |
| Is talkative                              | 1-E    | <b>0.752</b> | 0.154        | 0.082        |
| Generates enthusiasm                      | 32-E   | <b>0.608</b> | 0.200        | 0.237        |
| Assertive                                 | 40-E   | <b>0.726</b> | 0.244        | -0.035       |
| Outgoing                                  | 43-E   | <b>0.681</b> | 0.154        | 0.173        |
| Trusting                                  | 24-A   | <b>0.604</b> | 0.049        | 0.362        |
| Forgiving                                 | 28-A   | <b>0.553</b> | 0.105        | 0.344        |
| Makes plans                               | 34-C   | <b>0.411</b> | 0.241        | 0.369        |
| Energetic                                 | 11-E   | 0.085        | <b>0.773</b> | 0.201        |
| Thorough                                  | 3-C    | 0.159        | <b>0.720</b> | 0.163        |
| Reliable worker                           | 14-C   | 0.254        | <b>0.532</b> | 0.439        |
| Perseveres                                | 21-C   | 0.167        | <b>0.739</b> | 0.137        |
| Efficient                                 | 29-C   | 0.182        | <b>0.510</b> | 0.027        |
| Helpful, unselfish                        | 7-A    | 0.114        | 0.371        | <b>0.657</b> |
| Considerate                               | 37-A   | 0.290        | -0.026       | <b>0.661</b> |
| Cooperative                               | 41-A   | 0.136        | 0.276        | <b>0.750</b> |

**Table S14***Rotated Component Matrix (Unrestricted EFA) for Spouse-Report sample*

| Item                                      | Item # | Factor       |               |               |        |        |        |        |        |        |        |        |
|-------------------------------------------|--------|--------------|---------------|---------------|--------|--------|--------|--------|--------|--------|--------|--------|
|                                           |        | 1            | 2             | 3             | 4      | 5      | 6      | 7      | 8      | 9      | 10     | 11     |
| <i>Variance explained (post-rotation)</i> |        | 10.41%       | 10.17%        | 7.04%         | 4.43%  | 4.16%  | 4.01%  | 3.75%  | 3.56%  | 3.50%  | 3.03%  | 2.93%  |
| <i>Internal reliability (C. alpha)</i>    |        | 0.85         | 0.81          | 0.64          | 0.39   | 0.43   | 0.55   | -      | 0.40   | 0.35   | 0.26   | -      |
| Energetic                                 | 11-E   | <b>0.742</b> | -0.211        | -0.117        | -0.020 | -0.071 | 0.087  | 0.022  | 0.096  | -0.026 | 0.066  | 0.029  |
| Helpful, unselfish                        | 7-A    | <b>0.518</b> | -0.029        | -0.120        | 0.295  | 0.219  | -0.137 | 0.208  | 0.123  | -0.104 | 0.045  | 0.031  |
| Cooperative                               | 41-A   | <b>0.452</b> | 0.324         | -0.183        | 0.380  | 0.210  | 0.085  | 0.021  | -0.093 | 0.042  | -0.071 | -0.202 |
| Thorough                                  | 3-C    | <b>0.719</b> | -0.349        | 0.045         | -0.078 | -0.208 | 0.050  | -0.062 | 0.132  | -0.021 | 0.086  | -0.022 |
| Reliable worker                           | 14-C   | <b>0.701</b> | 0.155         | -0.135        | 0.100  | 0.063  | -0.009 | 0.018  | -0.154 | -0.145 | 0.020  | -0.054 |
| Perseveres                                | 21-C   | <b>0.664</b> | 0.215         | -0.115        | 0.014  | 0.145  | -0.014 | 0.269  | 0.008  | 0.071  | 0.044  | 0.043  |
| Efficient                                 | 29-C   | <b>0.500</b> | 0.271         | -0.234        | 0.177  | 0.055  | -0.002 | 0.142  | -0.041 | -0.062 | 0.145  | -0.103 |
| Makes plans                               | 34-C   | <b>0.481</b> | 0.026         | 0.115         | 0.359  | 0.095  | 0.182  | -0.077 | -0.007 | -0.119 | -0.180 | 0.169  |
| Original                                  | 5-O    | <b>0.422</b> | 0.183         | -0.363        | 0.253  | 0.142  | 0.176  | 0.234  | 0.066  | -0.203 | -0.021 | -0.031 |
| Inventive                                 | 23-O   | <b>0.691</b> | 0.000         | 0.055         | 0.041  | 0.140  | 0.171  | -0.045 | -0.003 | 0.131  | -0.046 | 0.011  |
| Ingenious                                 | 31-O   | <b>0.359</b> | 0.185         | -0.347        | 0.322  | 0.347  | 0.089  | 0.267  | 0.138  | -0.131 | -0.077 | -0.113 |
| Reserved                                  | 6-E    | 0.117        | <b>-0.708</b> | 0.137         | 0.182  | 0.077  | 0.126  | 0.036  | 0.060  | 0.051  | 0.043  | 0.105  |
| Outgoing                                  | 43-E   | 0.263        | <b>0.383</b>  | -0.374        | 0.348  | 0.157  | 0.230  | 0.154  | -0.084 | -0.174 | -0.047 | -0.181 |
| Cold or aloof                             | 33-A   | 0.135        | <b>0.679</b>  | -0.002        | 0.028  | 0.003  | -0.039 | 0.145  | 0.025  | -0.081 | -0.063 | 0.252  |
| Disorganized                              | 18-C   | 0.119        | <b>0.663</b>  | -0.138        | 0.208  | -0.085 | 0.031  | 0.199  | -0.051 | -0.180 | 0.110  | 0.222  |
| Lazy                                      | 25-C   | -0.167       | <b>0.623</b>  | 0.044         | -0.146 | 0.026  | 0.002  | 0.123  | 0.043  | 0.035  | -0.162 | -0.149 |
| Depressed, blue                           | 4-N    | 0.001        | <b>0.506</b>  | 0.142         | 0.172  | 0.037  | -0.020 | -0.173 | -0.046 | 0.132  | 0.098  | 0.178  |
| Emotionally stable                        | 19-N   | -0.114       | <b>-0.505</b> | 0.257         | -0.026 | 0.350  | 0.118  | -0.222 | 0.082  | 0.035  | -0.045 | 0.096  |
| Curious                                   | 10-O   | 0.316        | <b>0.500</b>  | -0.136        | 0.151  | -0.163 | 0.029  | -0.152 | -0.053 | -0.121 | 0.238  | 0.035  |
| Likes routine                             | 12-O   | 0.424        | <b>0.552</b>  | -0.209        | 0.023  | -0.153 | -0.019 | 0.121  | -0.028 | -0.229 | 0.108  | 0.041  |
| Is talkative                              | 1-E    | 0.163        | -0.077        | <b>-0.451</b> | 0.111  | 0.120  | 0.266  | -0.001 | -0.019 | -0.290 | -0.054 | -0.148 |
| Quiet                                     | 16-E   | -0.070       | -0.120        | <b>0.637</b>  | -0.019 | -0.066 | -0.030 | 0.111  | -0.145 | 0.085  | 0.082  | -0.169 |

|                          |      |        |        |              |              |              |               |              |              |              |              |              |
|--------------------------|------|--------|--------|--------------|--------------|--------------|---------------|--------------|--------------|--------------|--------------|--------------|
| Shy                      | 27-E | -0.075 | 0.328  | <b>0.605</b> | -0.122       | -0.066       | 0.098         | -0.086       | 0.213        | 0.102        | -0.106       | -0.095       |
| Tense                    | 15-N | -0.206 | -0.017 | <b>0.497</b> | -0.093       | 0.000        | -0.153        | -0.276       | 0.206        | -0.022       | 0.286        | -0.156       |
| Calm in tense situations | 35-N | -0.031 | -0.189 | <b>0.573</b> | 0.218        | 0.047        | -0.069        | 0.220        | 0.079        | -0.018       | -0.177       | 0.103        |
| Nervous easily           | 38-N | -0.068 | -0.213 | <b>0.642</b> | -0.076       | -0.077       | 0.071         | -0.288       | -0.018       | 0.011        | 0.037        | 0.024        |
| Trusting                 | 24-A | 0.278  | 0.086  | -0.060       | <b>0.483</b> | 0.288        | 0.033         | 0.264        | -0.034       | -0.134       | 0.137        | -0.016       |
| Likes art                | 17-O | 0.095  | -0.086 | -0.064       | <b>0.738</b> | -0.146       | 0.085         | -0.052       | -0.021       | 0.112        | 0.069        | 0.082        |
| Generates enthusiasm     | 32-E | 0.108  | -0.327 | -0.095       | -0.069       | <b>0.509</b> | 0.206         | 0.207        | 0.146        | 0.243        | 0.070        | -0.075       |
| Forgiving                | 28-A | 0.129  | -0.095 | -0.144       | 0.017        | <b>0.711</b> | 0.020         | -0.039       | -0.110       | -0.184       | 0.191        | -0.066       |
| Assertive                | 40-E | 0.164  | -0.084 | -0.178       | 0.027        | 0.441        | <b>0.457</b>  | -0.158       | -0.153       | 0.095        | -0.181       | 0.172        |
| Likes to reflect         | 36-O | 0.060  | 0.180  | -0.193       | 0.226        | -0.076       | <b>0.634</b>  | 0.052        | -0.074       | -0.043       | 0.198        | -0.143       |
| Sophisticated in arts    | 39-O | 0.066  | -0.414 | 0.161        | -0.086       | 0.151        | <b>0.603</b>  | -0.026       | 0.097        | 0.075        | -0.026       | 0.101        |
| Few artistic interests   | 44-O | -0.138 | 0.289  | -0.009       | -0.107       | -0.172       | <b>-0.480</b> | -0.125       | -0.177       | 0.097        | -0.159       | -0.146       |
| Relaxed                  | 9-N  | 0.113  | 0.101  | -0.045       | 0.021        | 0.003        | 0.020         | <b>0.695</b> | 0.006        | -0.034       | 0.106        | 0.042        |
| Finds fault              | 2-A  | 0.001  | -0.169 | 0.336        | -0.128       | -0.107       | 0.129         | -0.042       | <b>0.506</b> | 0.220        | 0.016        | -0.032       |
| Rude                     | 22-A | 0.071  | -0.013 | -0.044       | 0.036        | -0.014       | 0.013         | 0.074        | <b>0.799</b> | -0.112       | -0.035       | -0.129       |
| Moody                    | 30-N | -0.049 | -0.047 | -0.007       | -0.019       | 0.056        | -0.089        | -0.430       | <b>0.495</b> | 0.219        | 0.133        | 0.221        |
| Careless                 | 8-C  | -0.097 | -0.064 | 0.100        | -0.021       | -0.011       | -0.028        | -0.081       | 0.022        | <b>0.786</b> | 0.017        | -0.031       |
| Worrisome                | 26-N | 0.065  | -0.399 | 0.183        | 0.141        | -0.086       | 0.075         | 0.003        | 0.022        | <b>0.460</b> | -0.048       | -0.071       |
| Quarrelsome              | 13-A | 0.074  | 0.165  | -0.090       | -0.224       | -0.148       | 0.290         | 0.213        | 0.184        | 0.136        | <b>0.423</b> | 0.203        |
| Considerate              | 37-A | 0.082  | -0.039 | 0.087        | 0.131        | 0.194        | 0.088         | 0.054        | -0.028       | -0.017       | <b>0.764</b> | 0.009        |
| Easily distracted        | 42-C | -0.028 | 0.140  | -0.085       | 0.048        | -0.042       | 0.057         | 0.012        | -0.085       | -0.052       | 0.033        | <b>0.792</b> |
